# Supplementary material
Source: PubMed Central journal article supplement (PMC3365592)
Supplement: NIHMS379685-supplement-01.pdf [file NIHMS379685-supplement-01.pdf]

Type of file: figure

Label: Figure S1

Filename: FigS1.doc

**Fig S1.** Docking results for outward-facing SERT model: 1) 4D docking into 47 binding pocket conformations; 2) 4D docking into 5 binding pocket conformations; 3) 4D docking into 3 binding pocket conformations. Colour coding: green-favourable score, red-unfavourable score, black-ligand not in the binding pocket. Score in kcal/mol. NO<sub>2</sub> out mean 6-nitroquinolone moiety directed towards the extracellular regions of SERT and NO<sub>2</sub> in means 6-nitroquinolone moiety directed towards the intracellular regions of SERT.

1)

| 47 RECEPTOR CONFORMATIONS |                     |                    |                     |                    |                     |                    |                     |                    |
|---------------------------|---------------------|--------------------|---------------------|--------------------|---------------------|--------------------|---------------------|--------------------|
| Compounds                 | Parallel 1          |                    | Parallel 2          |                    | Parallel 3          |                    | Parallel 4          |                    |
|                           | NO <sub>2</sub> out | NO <sub>2</sub> in |
| 1                         | -3.91               |                    | -3.41               |                    | -0.78               |                    | -1.32               |                    |
| 2                         | -2.80               |                    | -1.55               |                    | -1.67               |                    | 3.90                |                    |
| 3                         |                     | 0.51               |                     |                    |                     | 39.74              |                     |                    |
| 4                         |                     |                    |                     |                    | 13.34               |                    | 15.29               |                    |
| 5                         | 23.79               |                    |                     |                    |                     |                    |                     |                    |
| 6                         | 3.19                |                    |                     |                    | 0.71                |                    | 20.79               |                    |
| 7                         |                     |                    |                     | 29.74              |                     |                    |                     | 4.69               |
| 8                         |                     |                    |                     |                    |                     |                    | 12.52               |                    |
| 9                         | 11.37               |                    | 16.80               |                    |                     |                    | 9.94                |                    |
| 10                        |                     | -6.15              |                     |                    | 7.14                |                    |                     |                    |
| 11                        | 16.96               |                    |                     |                    | 8.02                |                    |                     |                    |
| 12                        |                     |                    |                     |                    |                     |                    | 22.05               |                    |
| 13                        |                     | -1.34              | 8.04                |                    | 2.19                |                    | 7.53                |                    |
| 14                        |                     | 4.28               |                     | 7.53               | 7.34                |                    |                     |                    |
| 15                        | 6.91                |                    |                     |                    |                     |                    | 9.77                |                    |
| 16                        |                     | 1.57               | -6.39               |                    |                     | -1.52              | 6.06                |                    |
| 17                        | 7.49                |                    |                     |                    |                     | 1.58               | -8.23               |                    |
| 18                        |                     | -1.28              |                     |                    |                     | 6.55               |                     |                    |
| 19                        |                     | -8.98              |                     | 2.97               |                     | 10.99              |                     | 23.69              |

2)

| 5 SERT CONFORMATIONS |                     |                    |                     |                    |                     |                    |                     |                    |
|----------------------|---------------------|--------------------|---------------------|--------------------|---------------------|--------------------|---------------------|--------------------|
| Compounds            | Parallel 1          |                    | Parallel 2          |                    | Parallel 3          |                    | Parallel 4          |                    |
|                      | NO <sub>2</sub> out | NO <sub>2</sub> in |
| 1                    | 0.98                |                    | -1.02               |                    | -2.81               |                    | -1.00               |                    |
| 2                    | -5.85               |                    | -3.09               |                    | -2.79               |                    | -2.45               |                    |
| 3                    |                     | 26.07              |                     |                    |                     | 33.32              |                     |                    |
| 4                    | 12.60               |                    | 13.94               |                    | 12.87               |                    | 10.10               |                    |
| 5                    | 23.60               |                    |                     |                    | 23.44               |                    | 26.19               |                    |
| 6                    |                     | 55.07              | 21.01               |                    |                     | 60.74              | 21.95               |                    |
| 7                    |                     | 34.89              | 19.61               |                    |                     |                    | 19.65               |                    |
| 8                    | 15.06               |                    | 13.39               |                    | 14.31               |                    |                     | 26.51              |
| 9                    |                     |                    |                     |                    | 16.67               |                    |                     |                    |
| 10                   |                     | 16.67              | 10.05               |                    | 10.17               |                    |                     | -1.00              |
| 11                   |                     |                    |                     |                    |                     |                    |                     |                    |
| 12                   | 4.89                |                    |                     |                    | 10.86               |                    | 8.83                |                    |
| 13                   |                     | -4.10              | 0.83                |                    |                     |                    | 6.81                |                    |
| 14                   | 6.81                |                    |                     | 8.87               |                     | -1.78              |                     | 7.80               |
| 15                   | 7.11                |                    | 7.21                |                    |                     | 8.61               |                     | 8.86               |
| 16                   | 13.33               |                    |                     | 3.47               |                     | 42.19              | 14.35               |                    |
| 17                   | 13.17               |                    |                     | -9.91              | 15.24               |                    |                     |                    |
| 18                   | 3.21                |                    | 0.28                |                    |                     | 7.97               | 2.82                |                    |
| 19                   |                     | 7.35               | 1.97                |                    | 2.07                |                    | 4.33                |                    |

3)

| 3 SERT CONFORMATIONS |                     |                    |                     |                    |                     |                    |                     |                    |
|----------------------|---------------------|--------------------|---------------------|--------------------|---------------------|--------------------|---------------------|--------------------|
| Compounds            | Parallel 1          |                    | Parallel 2          |                    | Parallel 3          |                    | Parallel 4          |                    |
|                      | NO <sub>2</sub> out | NO <sub>2</sub> in |
| 1                    | -1.73               |                    | -2.72               |                    | -1.27               |                    | -2.58               |                    |
| 2                    | -2.49               |                    | -2.38               |                    | -2.47               |                    | -2.38               |                    |
| 3                    | 16.16               |                    |                     | 59.98              | 18.28               |                    | -5.70               |                    |
| 4                    | 10.81               |                    |                     | 13.71              | 11.28               |                    | 13.82               |                    |
| 5                    | 26.15               |                    | 24.65               |                    | 26.37               |                    | 27.07               |                    |
| 6                    |                     |                    | 23.54               |                    | 21.00               |                    |                     |                    |
| 7                    | 18.80               |                    |                     |                    | 21.71               |                    | 18.02               |                    |
| 8                    |                     | 24.17              | 20.02               |                    | 14.44               |                    | 13.69               |                    |
| 9                    |                     |                    |                     | 19.43              |                     | 19.52              |                     | -1.81              |
| 10                   |                     | 24.35              | 10.93               |                    | 9.73                |                    |                     | 18.15              |
| 11                   |                     |                    |                     |                    |                     |                    |                     |                    |
| 12                   | 3.99                |                    | 22.62               |                    |                     | 13.82              |                     | 16.62              |
| 13                   |                     |                    | -2.06               |                    | 3.19                |                    | -1.92               |                    |
| 14                   |                     | -1.80              | 14.52               |                    | 14.35               |                    | 7.07                |                    |
| 15                   | 2.97                |                    |                     | 9.041              | 6.93                |                    | 4.97                |                    |
| 16                   |                     | -3.76              | 11.84               |                    | 12.75               |                    |                     | -0.59              |
| 17                   | 10.35               |                    | 6.85                |                    | 8.67                |                    | 11.52               |                    |
| 18                   |                     | 0.83               | 12.86               |                    |                     | 17.39              |                     | -0.89              |
| 19                   | 4.46                |                    | 3.20                |                    | 4.30                |                    |                     | 9.82               |

Type of file: figure

Label: Figure S2

Filename: FigS2.doc

**Fig S2.** Docking results for occluded SERT model: 1) 4D docking into 5 substrate binding pocket conformations; 2) 4D docking into 5 vestibular binding pocket conformations. Colour coding: green-favourable score, red-unfavourable score, black-ligand not in the binding pocket. Score in kcal/mol. NO<sub>2</sub> out mean 6-nitroquinolone moiety directed towards the extracellular regions of SERT and NO<sub>2</sub> in means 6-nitroquinolone moiety directed towards the intracellular regions of SERT.

1)

| Compounds | SUBSTRATE BINDING POCKET |
|-----------|--------------------------|
| 1         | -0.14                    |
| 2         | -10.09                   |
| 3         | 116.30                   |
| 4         | 168.80                   |
| 5         | 117.50                   |
| 6         | 119.40                   |
| 7         | 109.20                   |
| 8         | 131.80                   |
| 9         | 100.60                   |
| 10        | 115.50                   |
| 11        | 133.30                   |
| 12        | 119.7                    |
| 13        | 82.02                    |
| 14        | 46.00                    |
| 15        | 77.39                    |
| 16        | 101.50                   |
| 17        | 7.87                     |
| 18        | 120.60                   |
| 19        | 155.10                   |

2)

| Compounds | VESTIBULAR BINDING POCKET |
|-----------|---------------------------|
| 1         |                           |
| 2         |                           |
| 3         |                           |
| 4         |                           |
| 5         |                           |
| 6         |                           |
| 7         |                           |
| 8         |                           |
| 9         |                           |
| 10        |                           |
| 11        |                           |
| 12        |                           |
| 13        |                           |
| 14        |                           |
| 15        |                           |
| 16        |                           |
| 17        |                           |
| 18        |                           |
| 19        |                           |

Type of file: figure

Label: Figure S3

Filename: FigS3.doc

**Fig S3.** SERT docking results: 1) Regular docking into binding pocket refined using ligand **9** and 2) Regular docking into binding pocket refined using ligand **13**. Colour coding: green-favourable score, red-unfavourable score, black-ligand not in the binding pocket. Score in kcal/mol. NO<sub>2</sub> out mean 6-nitroquinolone moiety directed towards the extracellular regions of SERT and NO<sub>2</sub> in means 6-nitroquinolone moiety directed towards the intracellular regions of SERT.

1)

| REFINED STRUCTURE (9) |                     |                    |                     |                    |                     |                    |                     |                    |
|-----------------------|---------------------|--------------------|---------------------|--------------------|---------------------|--------------------|---------------------|--------------------|
| Compounds             | Parallel 1          |                    | Parallel 2          |                    | Parallel 3          |                    | Parallel 4          |                    |
|                       | NO <sub>2</sub> out | NO <sub>2</sub> in |
| 1                     | -20.27              |                    | -22.09              |                    | -20.15              |                    | -18.66              |                    |
| 2                     | -8.10               |                    | -6.49               |                    | -7.22               |                    | -8.03               |                    |
| 3                     | -5.55               |                    | -5.85               |                    | -5.52               |                    | -5.72               |                    |
| 4                     |                     | 0.45               | -13.3               |                    |                     | -1.51              | -13.46              |                    |
| 5                     |                     | 30.77              |                     | 30.91              | 3.98                |                    |                     | 31.24              |
| 6                     | 4.08                |                    | 4.16                |                    | 4.17                |                    | 4.24                |                    |
| 7                     | -8.20               |                    | -10.76              |                    |                     | 6.77               | -8.92               |                    |
| 8                     | -7.62               |                    |                     | 6.39               | -7.03               |                    | -8.64               |                    |
| 9                     | -12.72              |                    | -8.53               |                    | -4.94               |                    |                     | -9.98              |
| 10                    | -14.99              |                    | -16.71              |                    | -16.07              |                    | -18.61              |                    |
| 11                    | 0.93                |                    | 8.55                |                    | 4.61                |                    | 7.51                |                    |
| 12                    | -13.01              |                    | -13.48              |                    | -10.95              |                    | -11.57              |                    |
| 13                    | -10.59              |                    | -16.02              |                    | -15.97              |                    |                     | -1.17              |
| 14                    | -15.92              |                    | -12.86              |                    | -18.72              |                    | -9.96               |                    |
| 15                    | -10.10              |                    | -12.15              |                    | -12.22              |                    |                     | -7.28              |
| 16                    | -11.55              |                    | -5.08               |                    | -11.13              |                    |                     | 42.84              |
| 17                    |                     | 9.18               | -4.88               |                    | -6.09               |                    |                     | 15.53              |
| 18                    | -10.33              |                    | -10.11              |                    | -11.42              |                    | -13.72              |                    |
| 19                    | -9.82               |                    | -11.66              |                    |                     | 4.84               | -9.92               |                    |

2)

| REFINED STRUCTURE (13) |                     |                    |                     |                    |                     |                    |                     |                    |
|------------------------|---------------------|--------------------|---------------------|--------------------|---------------------|--------------------|---------------------|--------------------|
| Compounds              | Parallel 1          |                    | Parallel 2          |                    | Parallel 3          |                    | Parallel 4          |                    |
|                        | NO <sub>2</sub> out | NO <sub>2</sub> in |
| 1                      | -20.27              |                    | -22.09              |                    | -20.15              |                    | -18.66              |                    |
| 2                      | -8.10               |                    | -6.49               |                    | -7.22               |                    | -8.03               |                    |
| 3                      | -6.56               |                    | -6.56               |                    | -3.04               |                    | -6.14               |                    |
| 4                      | -9.71               |                    | -2.58               |                    | -2.84               |                    | -2.98               |                    |
| 5                      |                     |                    |                     | 3.47               |                     |                    |                     | 30.01              |
| 6                      | 4.47                |                    | -1.77               |                    | -4.04               |                    | 3.01                |                    |
| 7                      | -6.57               |                    | -10.78              |                    | -6.44               |                    | -10.39              |                    |
| 8                      | -6.33               |                    | -5.10               |                    |                     | 10.64              | -6.74               |                    |
| 9                      | -3.42               |                    | -1.87               |                    | -4.73               |                    | -7.88               |                    |
| 10                     |                     | 6.82               | -10.35              |                    | -10.09              |                    | -3.43               |                    |
| 11                     | 16.20               |                    | 7.46                |                    |                     |                    |                     | 17.91              |
| 12                     | -10.78              |                    |                     | -6.08              | -11.30              |                    | -11.86              |                    |
| 13                     | -16.16              |                    | -16.14              |                    | -16.61              |                    | -15.91              |                    |
| 14                     | -18.41              |                    | -18.10              |                    |                     | -8.01              | -18.44              |                    |
| 15                     | -10.69              |                    | -10.80              |                    | -6.77               |                    | -12.72              |                    |
| 16                     |                     | 10.86              | -2.33               |                    | 3.68                |                    | 1.52                |                    |
| 17                     | -3.20               |                    | -2.26               |                    | -2.81               |                    | -2.86               |                    |
| 18                     | -3.52               |                    | -3.69               |                    | -8.09               |                    | -5.09               |                    |
| 19                     | -9.77               |                    | -10.85              |                    | -11.27              |                    | -5.91               |                    |
